# Supplementary material
Source: PubMed Central journal article supplement (PMC2789775)

**Fig. S1.** ApoC-III knockdown in HepG2 cells. A: HepG2 cells were incubated with 40 nM apoC-III specific siRNA as described in the Methods section. Endogenous apoC-III, apoE, and apoB-100 after the siRNA treatment were detected by immunoblotting. B: Metabolic labeling of medium TAG (top panel) and PC (bottom panel) with [<sup>3</sup>H]glycerol as described in Fig. 1A.

Table I. Nucleotide sequences of the PCR primers

|              |                                  |
|--------------|----------------------------------|
| C3 forward   | CAGT <u>GGATCCT</u> AGAGGCAGC    |
| C3 reverse   | CCCTG <u>AAGCTT</u> GCAGGACCCA   |
| A23T forward | CCACCAAGACCa <u>Ca</u> AAGGATGCA |
| A23T reverse | TGCATCCTT <u>tGt</u> GGTCTTGGTGG |

All sequences are 5' to 3' direction. The BamHI and HindIII restriction sites included in the forward and reverse PCR primers are indicated as underlined. In mutagenesis primers for C3A23T, the underlined sequences containing lower-cased nucleotides denote the positions of respective mutations.

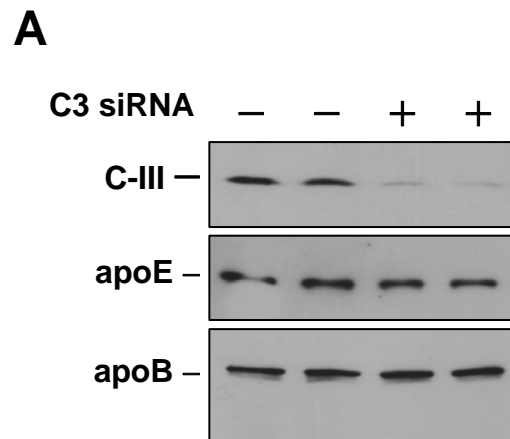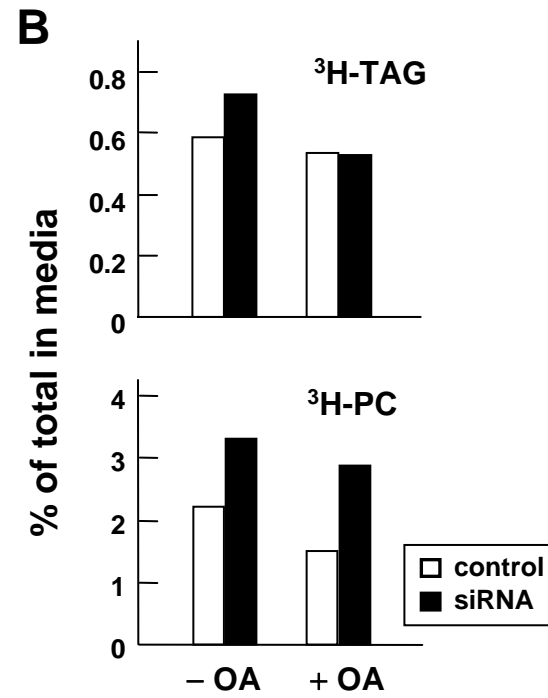

Supplement: supp_M900346-JLR200_Suppdata.pdf [file supp_M900346-JLR200_Suppdata.pdf]
